# Supplementary material for: Longistyline C acts antidepressant in vivo and neuroprotection in vitro against glutamate-induced cytotoxicity by regulating NMDAR/NR2B-ERK pathway in PC12 cells
Source: PubMed Central journal article supplement (PMC5584824; doi:10.1371/journal.pone.0183702), 2017-09-05
Supplement: pone.0183702.s001.pdf [file pone.0183702.s001.pdf]

### The data of longistyline C

C<sub>20</sub>H<sub>22</sub>O<sub>2</sub>:ESI-MS  $m/z$ : 293 [M-H]<sup>-</sup>, <sup>1</sup>H-NMR (600 MHz, CD<sub>3</sub>OD)  $\delta$ : 7.51 (2H, d,  $J$  = 8.4 Hz, H-2', 6'), 7.32 (2H, t,  $J$  = 7.2 Hz, H-3', 5'), 7.22 (1H, t,  $J$  = 7.2 Hz, H-4), 7.05 (2H, d,  $J$  = 3.0 Hz, H-7, 8), 6.65 (1H, d,  $J$  = 1.2 Hz, H-4), 6.63 (1H, d,  $J$  = 1.2 Hz, H-6), 5.12 (1H, t,  $J$  = 7.2 Hz, H-2''), 3.83 (3H, s, -OCH<sub>3</sub>), 3.29 (2H, d,  $J$  = 7.2 Hz, H-1''), 1.76 (3H, s, H-4''), 1.65 (3H, s, H-5''); <sup>13</sup>C-NMR (150 MHz, CD<sub>3</sub>OD)  $\delta$ : 160.2 (C-3), 157.1 (C-5), 139.2 (C-1'), 137.6 (C-1), 131.1 (C-3''), 130.4 (C-7), 129.9 (C-3', 5'), 128.8 (C-8), 128.6 (C-4'), 127.6 (C-2, 6'), 124.6 (C-2''), 117.9 (C-2), 107.6 (C-6), 102.1 (C-4), 55.8 (3-OCH<sub>3</sub>), 25.9 (C-1''), 23.1 (C-4''), 18.1 (C-5'')

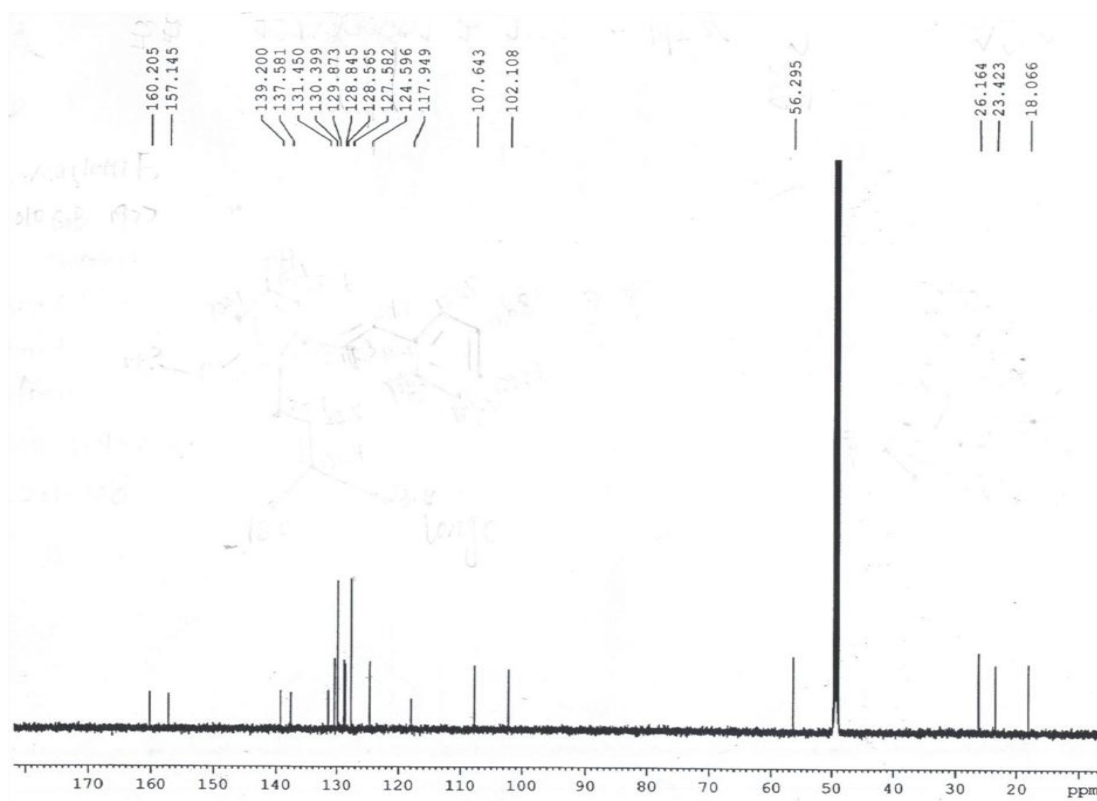

<sup>13</sup>C-NMR

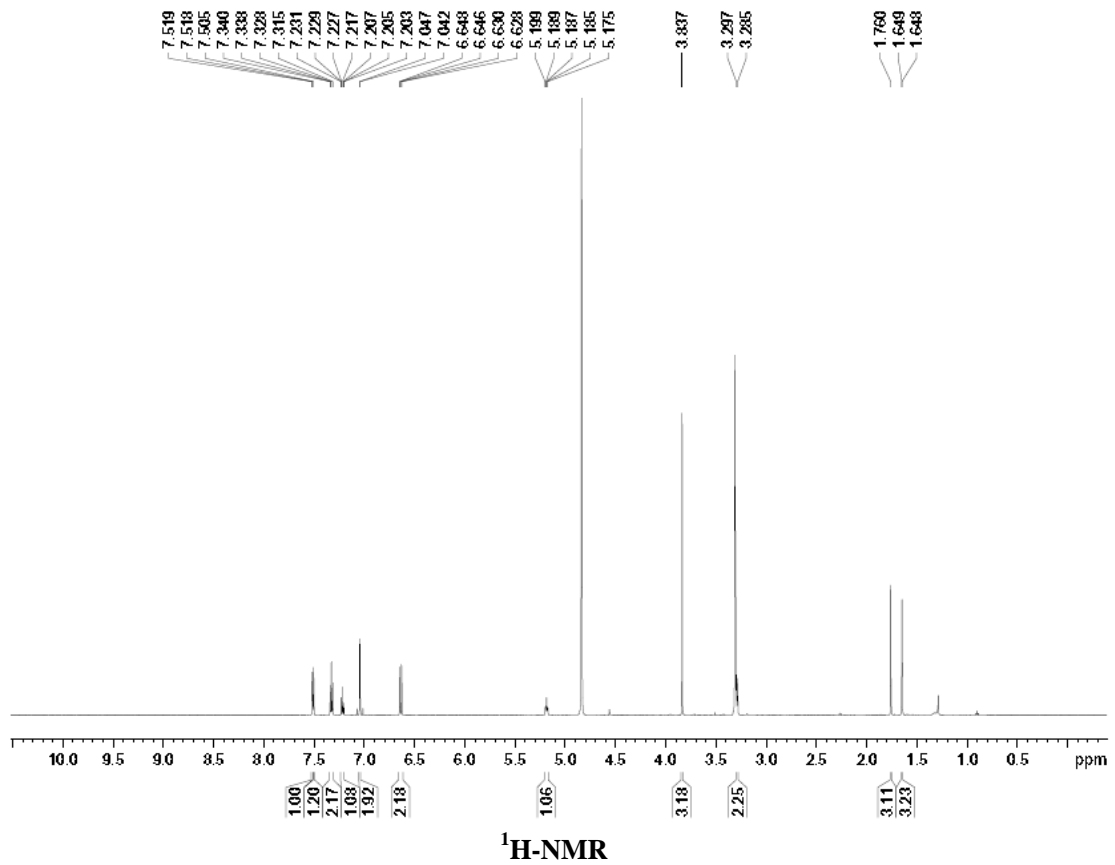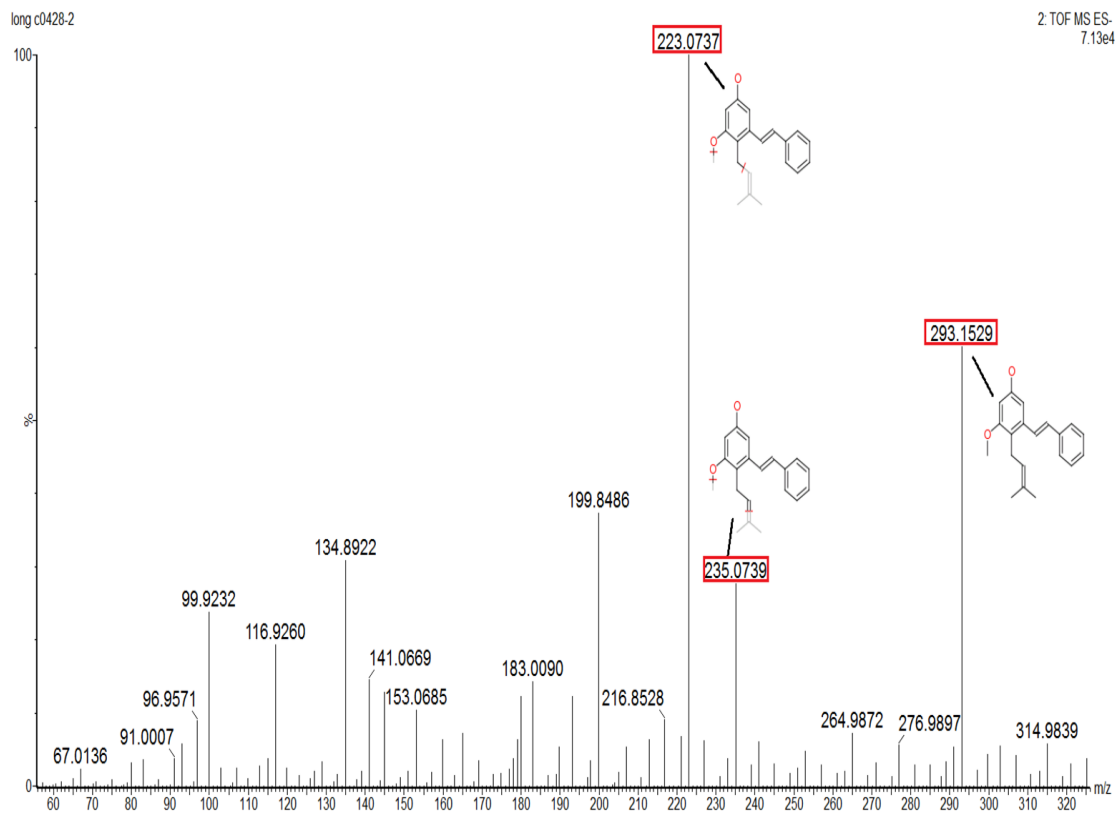

**The secondary fragments of longistyline C**
