# Supplementary material for: Longistyline C acts antidepressant in vivo and neuroprotection in vitro against glutamate-induced cytotoxicity by regulating NMDAR/NR2B-ERK pathway in PC12 cells
Source: PubMed Central journal article supplement (PMC5584824; doi:10.1371/journal.pone.0183702), 2017-09-05
Supplement: pone.0183702.s002.pdf [file pone.0183702.s002.pdf]

**SUPPORTING INFORMATION****fig.2a**

|                       | <b>Mg/kg</b> | <b>N</b>  | <b>Total distance (cm)</b> |
|-----------------------|--------------|-----------|----------------------------|
| <b>control</b>        | /            | <b>12</b> | <b>3023.37 ±281.98</b>     |
| <b>vehicle</b>        | /            | <b>12</b> | <b>2722.72 ±212.45</b>     |
| <b>paroxetine</b>     | <b>10</b>    | <b>12</b> | <b>2955.44 ±206.95</b>     |
| <b>longistyline C</b> | <b>7.5</b>   | <b>12</b> | <b>2617.31 ±144.60</b>     |
| <b>longistyline C</b> | <b>15</b>    | <b>12</b> | <b>2925.31 ±295.25</b>     |
| <b>longistyline C</b> | <b>30</b>    | <b>12</b> | <b>3226.35 ±171.74</b>     |

**fig.2b**

|                       | <b>Mg/kg</b> | <b>N</b>  | <b>Immobility time<br/>in 6min (s)</b> | <b>P</b>     |
|-----------------------|--------------|-----------|----------------------------------------|--------------|
| <b>control</b>        | /            | <b>12</b> | <b>47.96 ±12.17</b>                    | <b>0.616</b> |
| <b>vehicle</b>        | /            | <b>12</b> | <b>55.14 ±11.57</b>                    | /            |
| <b>paroxetine</b>     | <b>10</b>    | <b>11</b> | <b>22.13 ±6.57*</b>                    | <b>0.026</b> |
| <b>longistyline C</b> | <b>7.5</b>   | <b>11</b> | <b>47.16 ±9.41</b>                     | <b>0.586</b> |
| <b>longistyline C</b> | <b>15</b>    | <b>12</b> | <b>26.11 ±7.50*</b>                    | <b>0.021</b> |
| <b>longistyline C</b> | <b>30</b>    | <b>12</b> | <b>24.50 ±6.90*</b>                    | <b>0.035</b> |

**Table C (fig.2c)**

|                       | <b>Mg/kg</b> | <b>N</b>  | <b>Immobility time in 4 min (s)</b> | <b>P</b>     |
|-----------------------|--------------|-----------|-------------------------------------|--------------|
| <b>control</b>        | <b>/</b>     | <b>12</b> | <b>145.75±11.40</b>                 | <b>0.916</b> |
| <b>vehicle</b>        | <b>/</b>     | <b>12</b> | <b>147.63±8.49</b>                  | <b>/</b>     |
| <b>paroxetine</b>     | <b>10</b>    | <b>12</b> | <b>129.70±16.45</b>                 | <b>0.316</b> |
| <b>longistyline C</b> | <b>7.5</b>   | <b>12</b> | <b>130.86±14.78</b>                 | <b>0.348</b> |
| <b>longistyline C</b> | <b>15</b>    | <b>12</b> | <b>118.65±15.86</b>                 | <b>0.106</b> |
| <b>longistyline C</b> | <b>30</b>    | <b>12</b> | <b>119.94±10.04</b>                 | <b>0.122</b> |
