# Supplementary material for: Longistyline C acts antidepressant in vivo and neuroprotection in vitro against glutamate-induced cytotoxicity by regulating NMDAR/NR2B-ERK pathway in PC12 cells
Source: PubMed Central journal article supplement (PMC5584824; doi:10.1371/journal.pone.0183702), 2017-09-05
Supplement: pone.0183702.s003.pdf [file pone.0183702.s003.pdf]

**SUPPORTING INFORMATION**

**fig.3a**

| Control | 1 $\mu\text{mol/L}$ | 8 $\mu\text{mol/L}$ | 16 $\mu\text{mol/L}$ | 32 $\mu\text{mol/L}$ | 64 $\mu\text{mol/L}$ |
|---------|---------------------|---------------------|----------------------|----------------------|----------------------|
| 100.00  | 92.64               | 97.62               | 89.90                | 82.35                | 78.76                |
| 100.00  | 99.80               | 99.78               | 87.09                | 87.58                | 76.10                |
| 100.00  | 97.90               | 93.12               | 93.12                | 83.14                | 80.92                |
| 100.00  | 94.17               | 92.59               | 91.82                | 80.56                | 77.31                |

**fig.3b**

| Time | Control |        |        |        | 1.875mmol |       |        |       | 3.75mmol |       |       |       | 7.5mmol |       |       |       | 15mmol |       |       |       | 30mmol |       |       |       |
|------|---------|--------|--------|--------|-----------|-------|--------|-------|----------|-------|-------|-------|---------|-------|-------|-------|--------|-------|-------|-------|--------|-------|-------|-------|
| 4h   | 100.00  | 100.00 | 100.00 | 100.00 | 95.58     | 94.23 | 105.93 | 92.85 | 89.36    | 96.82 | 97.30 | 99.17 | 83.39   | 95.46 | 88.07 | 82.05 | 82.14  | 74.67 | 67.47 | 71.22 | 36.99  | 37.57 | 44.62 | 39.87 |
| 8h   | 100.00  | 100.00 | 100.00 | 100.00 | 99.90     | 90.24 | 95.03  | 96.68 | 96.77    | 92.91 | 92.97 | 95.74 | 87.47   | 76.30 | 78.60 | 88.58 | 68.88  | 63.21 | 64.32 | 68.00 | 10.15  | 9.19  | 4.20  | 5.26  |
| 12h  | 100.00  | 100.00 | 100.00 | 100.00 | 87.63     | 86.63 | 86.33  | 91.95 | 87.32    | 79.63 | 82.14 | 85.74 | 79.11   | 80.68 | 75.31 | 84.42 | 51.64  | 56.88 | 63.17 | 61.58 | 3.26   | 2.19  | 1.20  | 1.21  |
| 24h  | 100.00  | 100.00 | 100.00 | 100.00 | 89.78     | 73.25 | 78.75  | 93.79 | 84.34    | 89.62 | 81.36 | 69.63 | 68.96   | 63.39 | 65.80 | 70.05 | 51.13  | 52.12 | 51.30 | 54.47 | 0.15   | 0.19  | 0.25  | 0.05  |
