# Supplementary material for: Longistyline C acts antidepressant in vivo and neuroprotection in vitro against glutamate-induced cytotoxicity by regulating NMDAR/NR2B-ERK pathway in PC12 cells
Source: PubMed Central journal article supplement (PMC5584824; doi:10.1371/journal.pone.0183702), 2017-09-05
Supplement: pone.0183702.s004.pdf [file pone.0183702.s004.pdf]

**SUPPORTING INFORMATION**

**fig.4**

| <b>Control</b> |              | <b>1 <math>\mu\text{mol/L}</math></b> | <b>2 <math>\mu\text{g/mL}</math></b> | <b>4 <math>\mu\text{g/mL}</math></b> | <b>8 <math>\mu\text{g/mL}</math></b> | <b>16 <math>\mu\text{g/mL}</math></b> |
|----------------|--------------|---------------------------------------|--------------------------------------|--------------------------------------|--------------------------------------|---------------------------------------|
| <b>100.00</b>  | <b>64.16</b> | <b>60.71</b>                          | <b>73.21</b>                         | <b>76.21</b>                         | <b>75.46</b>                         | <b>62.60</b>                          |
| <b>100.00</b>  | <b>61.79</b> | <b>67.09</b>                          | <b>70.78</b>                         | <b>80.99</b>                         | <b>78.20</b>                         | <b>60.42</b>                          |
| <b>100.00</b>  | <b>55.07</b> | <b>66.12</b>                          | <b>67.17</b>                         | <b>78.86</b>                         | <b>94.65</b>                         | <b>58.80</b>                          |
| <b>100.00</b>  | <b>49.45</b> | <b>64.74</b>                          | <b>70.24</b>                         | <b>61.64</b>                         | <b>89.14</b>                         | <b>52.44</b>                          |
