# Supplementary material for: Longistyline C acts antidepressant in vivo and neuroprotection in vitro against glutamate-induced cytotoxicity by regulating NMDAR/NR2B-ERK pathway in PC12 cells
Source: PubMed Central journal article supplement (PMC5584824; doi:10.1371/journal.pone.0183702), 2017-09-05
Supplement: pone.0183702.s005.pdf [file pone.0183702.s005.pdf]

**SUPPORTING INFORMATION**

**fig.5**

| <b>Control</b> |                 | <b>2 <math>\mu\text{mol/L}</math></b> | <b>4 <math>\mu\text{mol/L}</math></b> | <b>8 <math>\mu\text{mol/L}</math></b> |
|----------------|-----------------|---------------------------------------|---------------------------------------|---------------------------------------|
| <b>100.00</b>  | <b>218.0328</b> | <b>136.0656</b>                       | <b>139.3443</b>                       | <b>132.7869</b>                       |
| <b>100.00</b>  | <b>201.6949</b> | <b>144.0678</b>                       | <b>150.8475</b>                       | <b>127.2881</b>                       |
| <b>100.00</b>  | <b>211.8644</b> | <b>140.678</b>                        | <b>140.678</b>                        | <b>143.8983</b>                       |
| <b>100.00</b>  | <b>201.5385</b> | <b>167.6923</b>                       | <b>136.9231</b>                       | <b>127.6923</b>                       |
