# Supplementary material for: Longistyline C acts antidepressant in vivo and neuroprotection in vitro against glutamate-induced cytotoxicity by regulating NMDAR/NR2B-ERK pathway in PC12 cells
Source: PubMed Central journal article supplement (PMC5584824; doi:10.1371/journal.pone.0183702), 2017-09-05
Supplement: pone.0183702.s006.pdf [file pone.0183702.s006.pdf]

**SUPPORTING INFORMATION**

**fig.6**

| <b>Control</b> |               | <b>2 <math>\mu\text{mol/L}</math></b> | <b>4 <math>\mu\text{mol/L}</math></b> | <b>8 <math>\mu\text{mol/L}</math></b> |
|----------------|---------------|---------------------------------------|---------------------------------------|---------------------------------------|
| <b>100.00</b>  | <b>137.53</b> | <b>144.65</b>                         | <b>127.27</b>                         | <b>117.41</b>                         |
| <b>100.00</b>  | <b>137.69</b> | <b>139.46</b>                         | <b>117.37</b>                         | <b>102.05</b>                         |
| <b>100.00</b>  | <b>130.79</b> | <b>125.01</b>                         | <b>114.92</b>                         | <b>112.92</b>                         |
| <b>100.00</b>  | <b>160.08</b> | <b>144.54</b>                         | <b>131.82</b>                         | <b>118.38</b>                         |
