# Supplementary material for: Longistyline C acts antidepressant in vivo and neuroprotection in vitro against glutamate-induced cytotoxicity by regulating NMDAR/NR2B-ERK pathway in PC12 cells
Source: PubMed Central journal article supplement (PMC5584824; doi:10.1371/journal.pone.0183702), 2017-09-05
Supplement: pone.0183702.s007.pdf [file pone.0183702.s007.pdf]

**SUPPORTING INFORMATION****fig.7a**

| <b>Quad%</b> |                |              |                 |              |
|--------------|----------------|--------------|-----------------|--------------|
| <b>Gated</b> | <b>Control</b> | <b>GLU</b>   | <b>GLU+LONC</b> | <b>LONC</b>  |
| <b>UL</b>    | <b>2.63</b>    | <b>14.47</b> | <b>3.16</b>     | <b>2.67</b>  |
| <b>UR</b>    | <b>0.10</b>    | <b>10.97</b> | <b>10.90</b>    | <b>1.07</b>  |
| <b>LL</b>    | <b>97.05</b>   | <b>69.08</b> | <b>84.32</b>    | <b>92.63</b> |
| <b>LR</b>    | <b>0.22</b>    | <b>5.48</b>  | <b>1.62</b>     | <b>3.63</b>  |

**fig.7b**

| <b>Apoptosis%</b> |              |                 |             |
|-------------------|--------------|-----------------|-------------|
| <b>Control</b>    | <b>GLU</b>   | <b>GLU+LONC</b> | <b>LONC</b> |
| <b>3.00</b>       | <b>31.00</b> | <b>15.68</b>    | <b>8.00</b> |
| <b>3.20</b>       | <b>34.00</b> | <b>12.00</b>    | <b>7.30</b> |
| <b>1.90</b>       | <b>32.00</b> | <b>10.00</b>    | <b>8.30</b> |
| <b>4.00</b>       | <b>28.00</b> | <b>17.00</b>    | <b>5.60</b> |
