# Supplementary material for: Longistyline C acts antidepressant in vivo and neuroprotection in vitro against glutamate-induced cytotoxicity by regulating NMDAR/NR2B-ERK pathway in PC12 cells
Source: PubMed Central journal article supplement (PMC5584824; doi:10.1371/journal.pone.0183702), 2017-09-05
Supplement: pone.0183702.s008.pdf [file pone.0183702.s008.pdf]

**SUPPORTING INFORMATION**

**fig.8**

| <b>Control</b> |              | <b>2 <math>\mu\text{mol/L}</math></b> | <b>4 <math>\mu\text{mol/L}</math></b> | <b>8 <math>\mu\text{mol/L}</math></b> |
|----------------|--------------|---------------------------------------|---------------------------------------|---------------------------------------|
| <b>10.00</b>   | <b>46.25</b> | <b>50.00</b>                          | <b>33.75</b>                          | <b>12.50</b>                          |
| <b>10.00</b>   | <b>72.00</b> | <b>55.00</b>                          | <b>38.00</b>                          | <b>24.00</b>                          |
| <b>10.00</b>   | <b>54.29</b> | <b>44.29</b>                          | <b>30.71</b>                          | <b>11.43</b>                          |
| <b>10.00</b>   | <b>61.67</b> | <b>51.67</b>                          | <b>48.33</b>                          | <b>15.00</b>                          |
