# Supplementary material for: Longistyline C acts antidepressant in vivo and neuroprotection in vitro against glutamate-induced cytotoxicity by regulating NMDAR/NR2B-ERK pathway in PC12 cells
Source: PubMed Central journal article supplement (PMC5584824; doi:10.1371/journal.pone.0183702), 2017-09-05
Supplement: pone.0183702.s009.pdf [file pone.0183702.s009.pdf]

**SUPPORTING INFORMATION**

**fig.9a**

| <b>NR2B</b>    |             |                 |             |
|----------------|-------------|-----------------|-------------|
| <b>Control</b> | <b>GLU</b>  | <b>GLU+LONC</b> | <b>LONC</b> |
| <b>0.40</b>    | <b>1.10</b> | <b>0.53</b>     | <b>0.08</b> |
| <b>0.56</b>    | <b>1.06</b> | <b>0.52</b>     | <b>0.16</b> |
| <b>0.55</b>    | <b>1.16</b> | <b>0.56</b>     | <b>0.15</b> |
| <b>0.49</b>    | <b>1.08</b> | <b>0.60</b>     | <b>0.10</b> |

**fig.9b**

| <b>CaMKII</b>  |             |                 |             |
|----------------|-------------|-----------------|-------------|
| <b>Control</b> | <b>GLU</b>  | <b>GLU+LONC</b> | <b>LONC</b> |
| <b>0.96</b>    | <b>1.14</b> | <b>0.73</b>     | <b>0.16</b> |
| <b>0.86</b>    | <b>1.20</b> | <b>0.62</b>     | <b>0.12</b> |
| <b>0.95</b>    | <b>1.26</b> | <b>0.66</b>     | <b>0.10</b> |
| <b>1.05</b>    | <b>1.28</b> | <b>0.54</b>     | <b>0.08</b> |

fig.9c

| <b>ERK1/2</b>   |             |                 |             |
|-----------------|-------------|-----------------|-------------|
| <b>Control</b>  | <b>GLU</b>  | <b>GLU+LONC</b> | <b>LONC</b> |
| <b>0.50</b>     | <b>0.50</b> | <b>0.53</b>     | <b>0.58</b> |
| <b>0.56</b>     | <b>0.56</b> | <b>0.54</b>     | <b>0.56</b> |
| <b>0.52</b>     | <b>0.56</b> | <b>0.56</b>     | <b>0.55</b> |
| <b>0.50</b>     | <b>0.58</b> | <b>0.49</b>     | <b>0.50</b> |
| <b>P-ERK1/2</b> |             |                 |             |
| <b>Control</b>  | <b>GLU</b>  | <b>GLU+LONC</b> | <b>LONC</b> |
| <b>0.86</b>     | <b>0.20</b> | <b>0.33</b>     | <b>0.60</b> |
| <b>0.76</b>     | <b>0.19</b> | <b>0.42</b>     | <b>0.66</b> |
| <b>0.85</b>     | <b>0.16</b> | <b>0.36</b>     | <b>0.75</b> |
| <b>0.89</b>     | <b>0.28</b> | <b>0.34</b>     | <b>0.61</b> |
