# Supplementary material for: Longistyline C acts antidepressant in vivo and neuroprotection in vitro against glutamate-induced cytotoxicity by regulating NMDAR/NR2B-ERK pathway in PC12 cells
Source: PubMed Central journal article supplement (PMC5584824; doi:10.1371/journal.pone.0183702), 2017-09-05
Supplement: pone.0183702.s010.pdf [file pone.0183702.s010.pdf]

**SUPPORTING INFORMATION**

**fig.10a**

| <b>CREB</b>    |             |                 |             |
|----------------|-------------|-----------------|-------------|
| <b>Control</b> | <b>GLU</b>  | <b>GLU+LONC</b> | <b>LONC</b> |
| <b>0.50</b>    | <b>0.50</b> | <b>0.53</b>     | <b>0.58</b> |
| <b>0.46</b>    | <b>0.48</b> | <b>0.52</b>     | <b>0.49</b> |
| <b>0.55</b>    | <b>0.46</b> | <b>0.48</b>     | <b>0.53</b> |
| <b>0.50</b>    | <b>0.58</b> | <b>0.50</b>     | <b>0.52</b> |

**fig.10b**

| <b>p-CREB</b>  |             |                 |             |
|----------------|-------------|-----------------|-------------|
| <b>Control</b> | <b>GLU</b>  | <b>GLU+LONC</b> | <b>LONC</b> |
| <b>1.16</b>    | <b>0.64</b> | <b>0.93</b>     | <b>1.16</b> |
| <b>1.06</b>    | <b>0.60</b> | <b>1.12</b>     | <b>1.06</b> |
| <b>1.25</b>    | <b>0.66</b> | <b>1.16</b>     | <b>1.20</b> |
| <b>0.95</b>    | <b>0.58</b> | <b>1.20</b>     | <b>0.99</b> |
