# Supplementary material for: Longistyline C acts antidepressant in vivo and neuroprotection in vitro against glutamate-induced cytotoxicity by regulating NMDAR/NR2B-ERK pathway in PC12 cells
Source: PubMed Central journal article supplement (PMC5584824; doi:10.1371/journal.pone.0183702), 2017-09-05
Supplement: pone.0183702.s011.pdf [file pone.0183702.s011.pdf]

**SUPPORTING INFORMATION**

**fig.11a**

| <b>GADD153</b> |             |                 |             |
|----------------|-------------|-----------------|-------------|
| <b>Control</b> | <b>GLU</b>  | <b>GLU+LONC</b> | <b>LONC</b> |
| <b>0.30</b>    | <b>1.80</b> | <b>0.63</b>     | <b>0.47</b> |
| <b>0.26</b>    | <b>1.78</b> | <b>0.72</b>     | <b>0.44</b> |
| <b>0.25</b>    | <b>1.66</b> | <b>0.56</b>     | <b>0.30</b> |
| <b>0.20</b>    | <b>1.58</b> | <b>0.64</b>     | <b>0.56</b> |
| <b>0.89</b>    | <b>1.28</b> | <b>0.71</b>     | <b>0.70</b> |

**fig.11b**

| <b>GRP78</b>   |             |                 |             |
|----------------|-------------|-----------------|-------------|
| <b>Control</b> | <b>GLU</b>  | <b>GLU+LONC</b> | <b>LONC</b> |
| <b>0.90</b>    | <b>1.20</b> | <b>0.87</b>     | <b>0.88</b> |
| <b>0.86</b>    | <b>1.28</b> | <b>0.77</b>     | <b>0.76</b> |
| <b>0.99</b>    | <b>1.16</b> | <b>0.82</b>     | <b>0.60</b> |

**fig.11c**

| <b>XBP-1</b>   |             |                 |             |
|----------------|-------------|-----------------|-------------|
| <b>Control</b> | <b>GLU</b>  | <b>GLU+LONC</b> | <b>LONC</b> |
| <b>0.60</b>    | <b>1.36</b> | <b>0.93</b>     | <b>0.60</b> |
| <b>0.56</b>    | <b>1.24</b> | <b>1.08</b>     | <b>0.65</b> |
| <b>0.45</b>    | <b>1.36</b> | <b>0.97</b>     | <b>0.54</b> |

|             |             |             |             |
|-------------|-------------|-------------|-------------|
| <b>0.50</b> | <b>1.38</b> | <b>0.93</b> | <b>0.62</b> |
|-------------|-------------|-------------|-------------|

**fig.11d**

| <b>caspase-12</b> |             |                 |             |
|-------------------|-------------|-----------------|-------------|
| <b>Control</b>    | <b>GLU</b>  | <b>GLU+LONC</b> | <b>LONC</b> |
| <b>0.30</b>       | <b>0.84</b> | <b>0.35</b>     | <b>0.18</b> |
| <b>0.22</b>       | <b>0.83</b> | <b>0.27</b>     | <b>0.23</b> |
| <b>0.26</b>       | <b>0.74</b> | <b>0.37</b>     | <b>0.24</b> |
| <b>0.26</b>       | <b>0.84</b> | <b>0.25</b>     | <b>0.17</b> |

**fig.11e**

| <b>caspase-9</b> |             |                 |             |
|------------------|-------------|-----------------|-------------|
| <b>Control</b>   | <b>GLU</b>  | <b>GLU+LONC</b> | <b>LONC</b> |
| <b>0.20</b>      | <b>1.20</b> | <b>0.33</b>     | <b>0.27</b> |
| <b>0.26</b>      | <b>1.19</b> | <b>0.32</b>     | <b>0.22</b> |
| <b>0.25</b>      | <b>0.96</b> | <b>0.46</b>     | <b>0.30</b> |
| <b>0.20</b>      | <b>1.28</b> | <b>0.44</b>     | <b>0.31</b> |
